# Supplementary material for: Investigating the Synergistic Potential of Low-Dose HDAC3 Inhibition and Radiotherapy in Alzheimer’s Disease Models
Source: PubMed Central journal article supplement (PMC10293392; doi:10.1007/s12035-023-03373-0), 2023-05-12

Figure S4

**A**

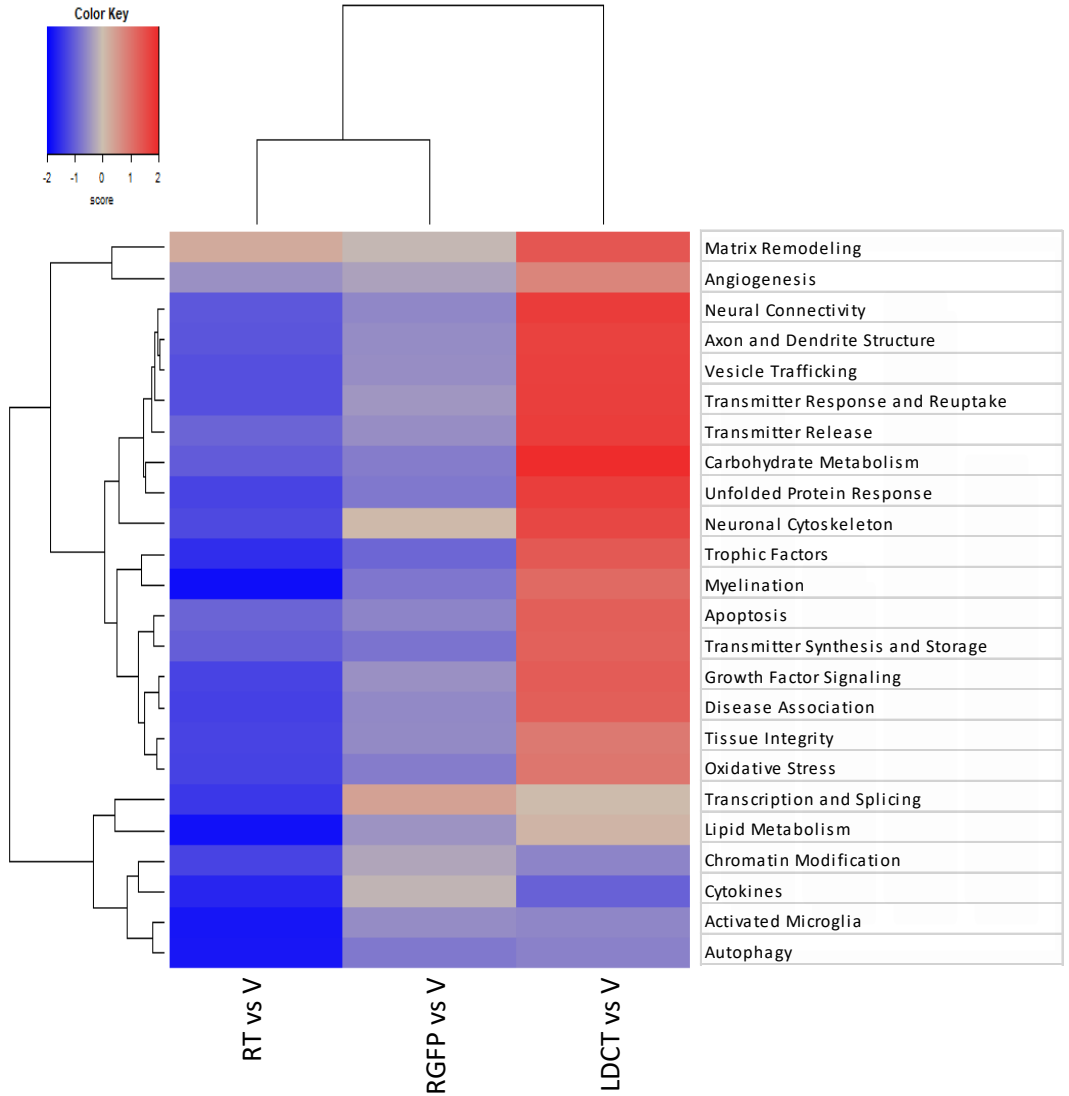

**B**

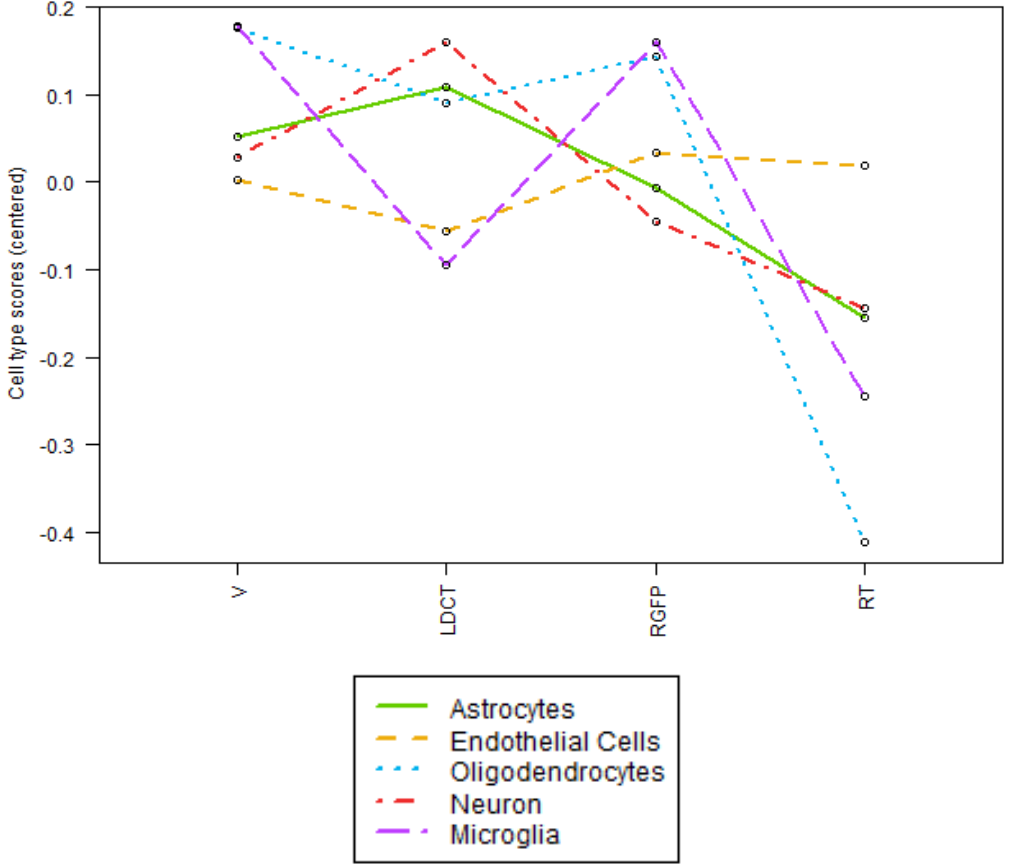

Supplement: 12035_2023_3373_MOESM4_ESM.pdf [file 12035_2023_3373_MOESM4_ESM.pdf]
